# Supplementary material for: Design and Development of Levodopa Loaded Polymeric Nanoparticles for Intranasal Delivery
Source: MDPI journal article supplement (doi:10.3390/ph15030370), 2022-03-18
Supplement: s1 [file s1]

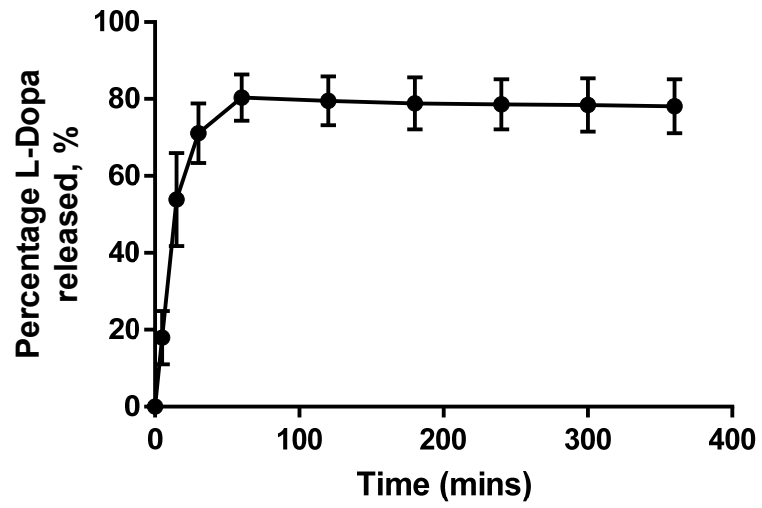

Figure S1 release profile of L-Dopa from chitosan nanoparticles (C2) when under physiological pH of nasal lining (pH 6.0) at 37°C. Data expressed as mean  $\pm$  SEM (n=3)
